Published by

THE AMERICAN  
SOCIETY FOR  
CELL  
BIOLOGY

CBE

# Life Sciences Education

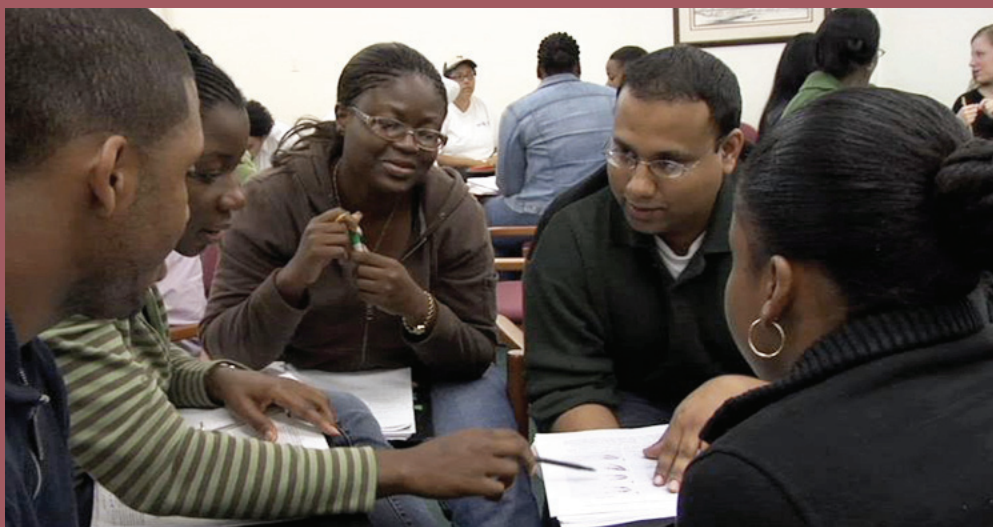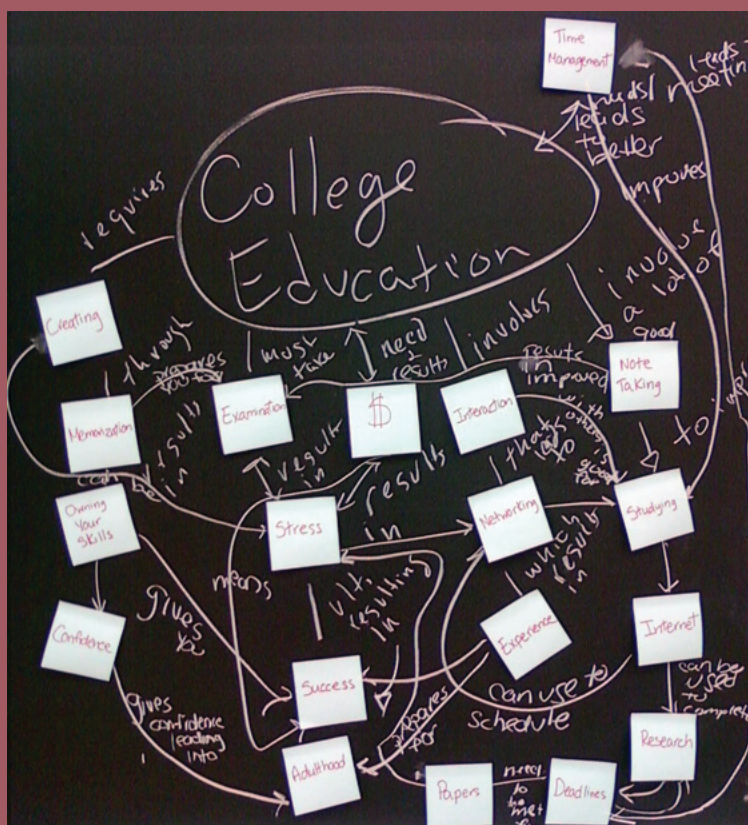

## Analyzing Primary Literature
