# Table of Contents

## FEATURES

### *Approaches to Biology Teaching and Learning* **Reconsidering “What Works”**

Kimberly D. Tanner . . . . . 329–333

### *Current Insights*

#### **Recent Research in Science Teaching and Learning**

Deborah Allen . . . . . 334–337

### *Book Review*

#### **In the Name of the Scientist**

José Vázquez . . . . . 338–339

### *Book Review*

#### **Probing the Origins of British Romantic Science**

Jared Poley . . . . . 340–341

### *Meeting Report*

#### **GCAT-SEEKquence: Genome Consortium for Active Teaching of Undergraduates through Increased Faculty Access to Next-Generation Sequencing Data**

Vincent P. Buonaccorsi, Michael D. Boyle, Deborah Grove, Craig Praul, Eric Sakk, Ash Stuart, Tammy Tobin, Jay Hosler, Susan L. Carney, Michael J. Engle, Barry E. Overton, Jeffrey D. Newman, Marie Pizzorno, Jennifer R. Powell, and Nancy Trun . . . . . 342–345

## ARTICLES

### **Assessment of Learning Gains Associated with Independent Exam Analysis in Introductory Biology**

Adrienne E. Williams, Nancy M. Aguilar-Roca, Michelle Tsai, Matthew Wong, Marin Moravec Beaupré, and Diane K. O’Dowd . . . . . 346–356

### **Integrating Theory and Practice to Increase Scientific Workforce Diversity: A Framework for Career Development in Graduate Research Training**

Angela Byars-Winston, Belinda Gutierrez, Sharon Topp, and Molly Carnes . . . . . 357–367

### **The C.R.E.A.T.E. Approach to Primary Literature Shifts Undergraduates’ Self-Assessed Ability to Read and Analyze Journal Articles, Attitudes about Science, and Epistemological Beliefs**

Sally G. Hoskins, David Lopatto, and Leslie M. Stevens . . . . . 368–378

### **Applying Computerized-Scoring Models of Written Biological Explanations across Courses and Colleges: Prospects and Limitations**

Minsu Ha, Ross H. Nehm, Mark Urban-Lurain, and John E. Merrill . . . . . 379–393

### **Active Learning *Not* Associated with Student Learning in a Random Sample of College Biology Courses**

T. M. Andrews, M. J. Leonard, C. A. Colgrove, and S. T. Kalinowski . . . . . 394–405

### **Using Clickers to Facilitate Development of Problem-Solving Skills**

Aime A. Levesque . . . . . 406–417

### **Osmosis and Diffusion Conceptual Assessment**

Kathleen M. Fisher, Kathy S. Williams, and Jennifer Evarts Lineback . . . . . 418–429

### **Adding an Extra Dimension to What Students See through the Light Microscope: A Lab Exercise Demonstrating Critical Analysis for Microscopy Students**

Ashley Garrill . . . . . 430–435

## On the Cover

Top: Students discuss a figure from a journal article in Biology 355: *Analysis of Scientific Literature with C.R.E.A.T.E.*, an upper-level (junior/senior) biology elective at the City College of New York. The C.R.E.A.T.E. (Consider, Read, Elucidate hypotheses, Analyze and interpret the data, and Think of the next Experiment) strategy provides a framework for following the logic of a paper, including its approach to addressing a scientific question and the evolution of the project as it progresses over a period of years. Students read series of papers produced sequentially by individual lab groups and use novel approaches to analyze the experiments summarized in each figure or table. Students also survey the authors to gain insight into “the people behind the papers” and the nature of science.

Bottom: A concept map generated by a group of students during the first class meeting. Concept mapping is new to most college students, and developing a quick map on the topic of “college education” introduces the approach while underscoring that there is no single “correct” map. C.R.E.A.T.E. students subsequently concept map paper introductions to situate themselves in the study content and define areas to review. After each paper is analyzed, students again use concept mapping to define the significance of each figure and table and to visualize the experimental logic of the paper. Students make use of concept mapping and other C.R.E.A.T.E. tools to make sense of papers and lines of research, including cartooning, annotating figures, transforming data tables into graphical form, and designing follow-up studies. As outlined in the article by Hoskins, Lopatto, and Stevens (see page 368), the C.R.E.A.T.E. course shifts students’ attitudes about science, their own abilities, and the nature of science.
